# Supplementary material
Source: publisher figshare collection journal article supplement (https://acs.figshare.com/ndownloader/files/14531402)
Supplement: Supplementary file 1 [file 14531402]

## Supporting Information

# Microstructure and Tribological Properties of Lamellar Liquid Crystals Formed by Ionic Liquids as Cosurfactants

*Liping Chen<sup>a, b</sup>, Lingling Ge<sup>a</sup>, Lei Fan<sup>a,\*</sup> and Rong Guo<sup>a,\*</sup>*

<sup>a</sup>School of Chemistry and Chemical Engineering, Yangzhou University, Yangzhou 225002, P. R. China.

E-mail: fanlei@yzu.edu.cn; guorong@yzu.edu.cn

<sup>b</sup>Department of Chemical Engineering, Yangzhou Polytechnic Institute, Yangzhou 225127, P. R. China.

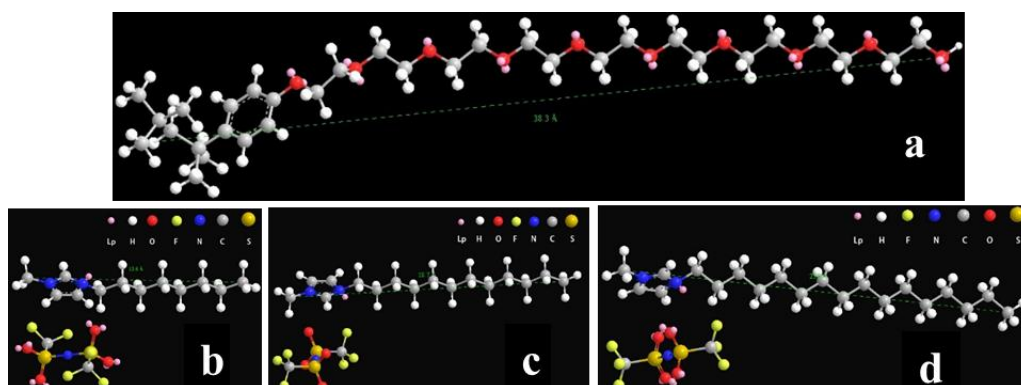

**Figure. S1** Molecular structures of the simulation model of Triton X-100 (a), C<sub>8</sub>mimNTf<sub>2</sub> (b), C<sub>12</sub>mimNTf<sub>2</sub> (c) and C<sub>16</sub>mimNTf<sub>2</sub> (d).

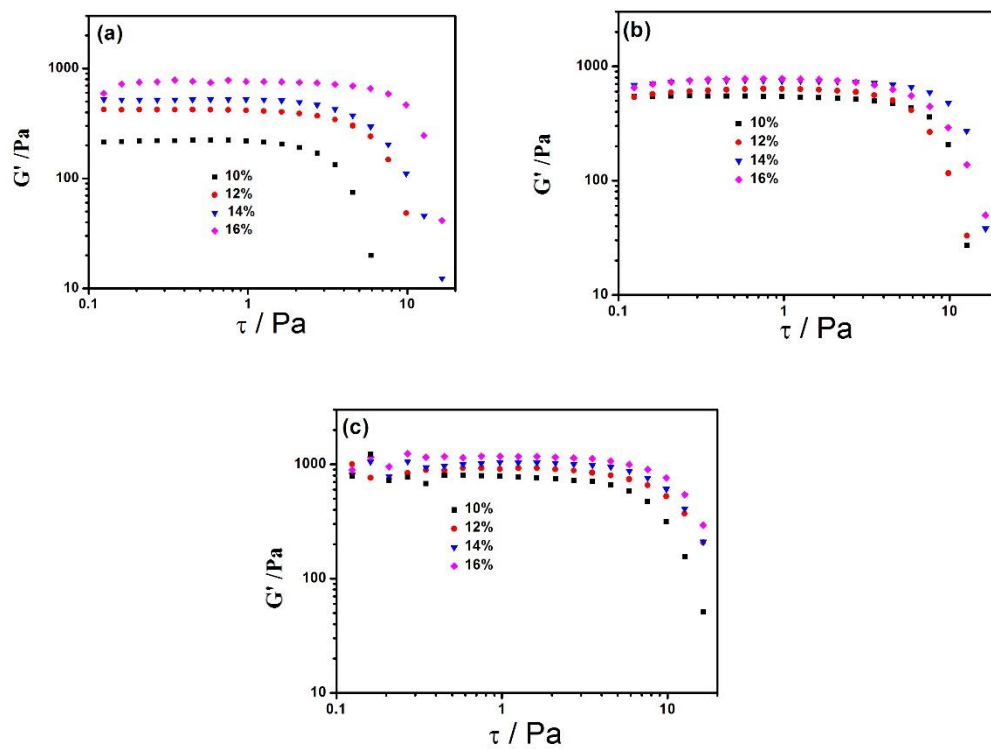

**Figure. S2** Variations of elastic modulus ( $G'$ ) as a function of oscillatory stress  $\tau$  (a-c) for different concentrations (10, 12, 14 and 16 wt%) of  $C_n$  mimNTf<sub>2</sub> at the constant weight ratio 1.25 of Triton X-100 to H<sub>2</sub>O, where (a)  $n=8$ , (b)  $n=12$ , (c)  $n=16$ .
